# Supplementary material for: Combination therapy of menstrual derived mesenchymal stem cells and antibiotics ameliorates survival in sepsis
Source: PubMed Central journal article supplement (PMC4609164; doi:10.1186/s13287-015-0192-0), 2015-10-16
Supplement: 13287_2015_192_MOESM1_ESM.pdf [file 13287_2015_192_MOESM1_ESM.pdf]

# Additional File 1

(A)

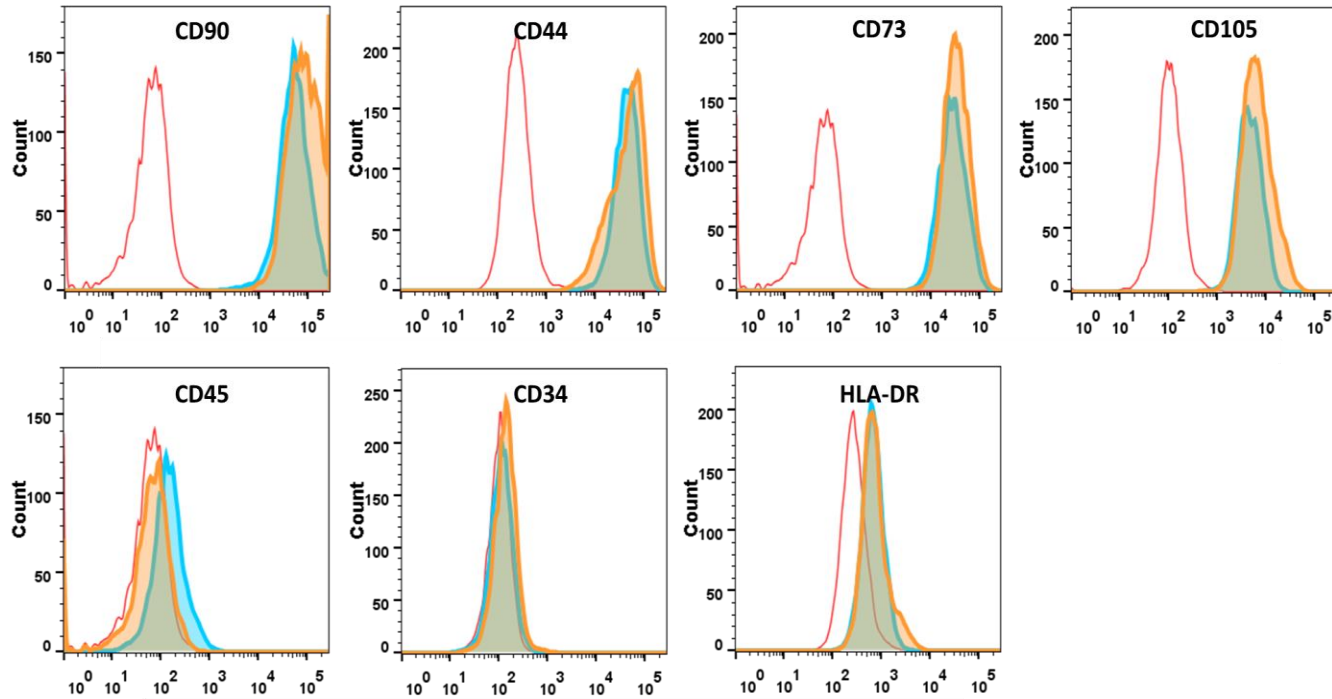

(B)

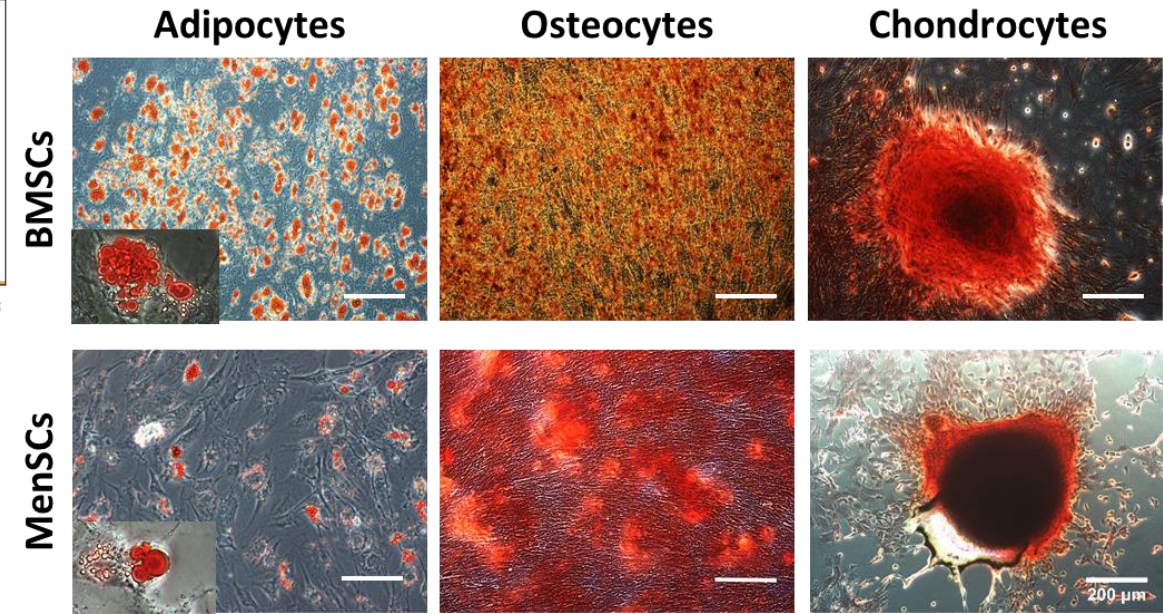

**Supplementary Figure 1. Characterization of MenSCs and BMSCs.** Stem cells isolated from the menstrual fluid and bone marrow were characterized according to ISCT guidelines. **(A) MenSCs and BMSCs showed stem cell-like immunophenotypic markers.** FACS profile of a representative cells samples. Blue and orange filled histograms denote the fluorescent profile of the indicated antigens in MenSCs and BMSCs, respectively; red histograms correspond to isotype-matched controls. **(B) MenSCs and BMSCs displayed mesodermal differentiation.** Tri-lineage differentiation of a representative MenSCs and BMSCs samples. Cells were cultured with adipogenic, osteogenic and chondrogenic induction media for 14-21 days and then stained with Oil Red O, Alizarin Red and Safranin O staining, respectively. Scale Bar: 200 $\mu$ m.
