# Supplementary material for: Combination therapy of menstrual derived mesenchymal stem cells and antibiotics ameliorates survival in sepsis
Source: PubMed Central journal article supplement (PMC4609164; doi:10.1186/s13287-015-0192-0), 2015-10-16
Supplement: 13287_2015_192_MOESM2_ESM.pdf [file 13287_2015_192_MOESM2_ESM.pdf]

## Additional File 2

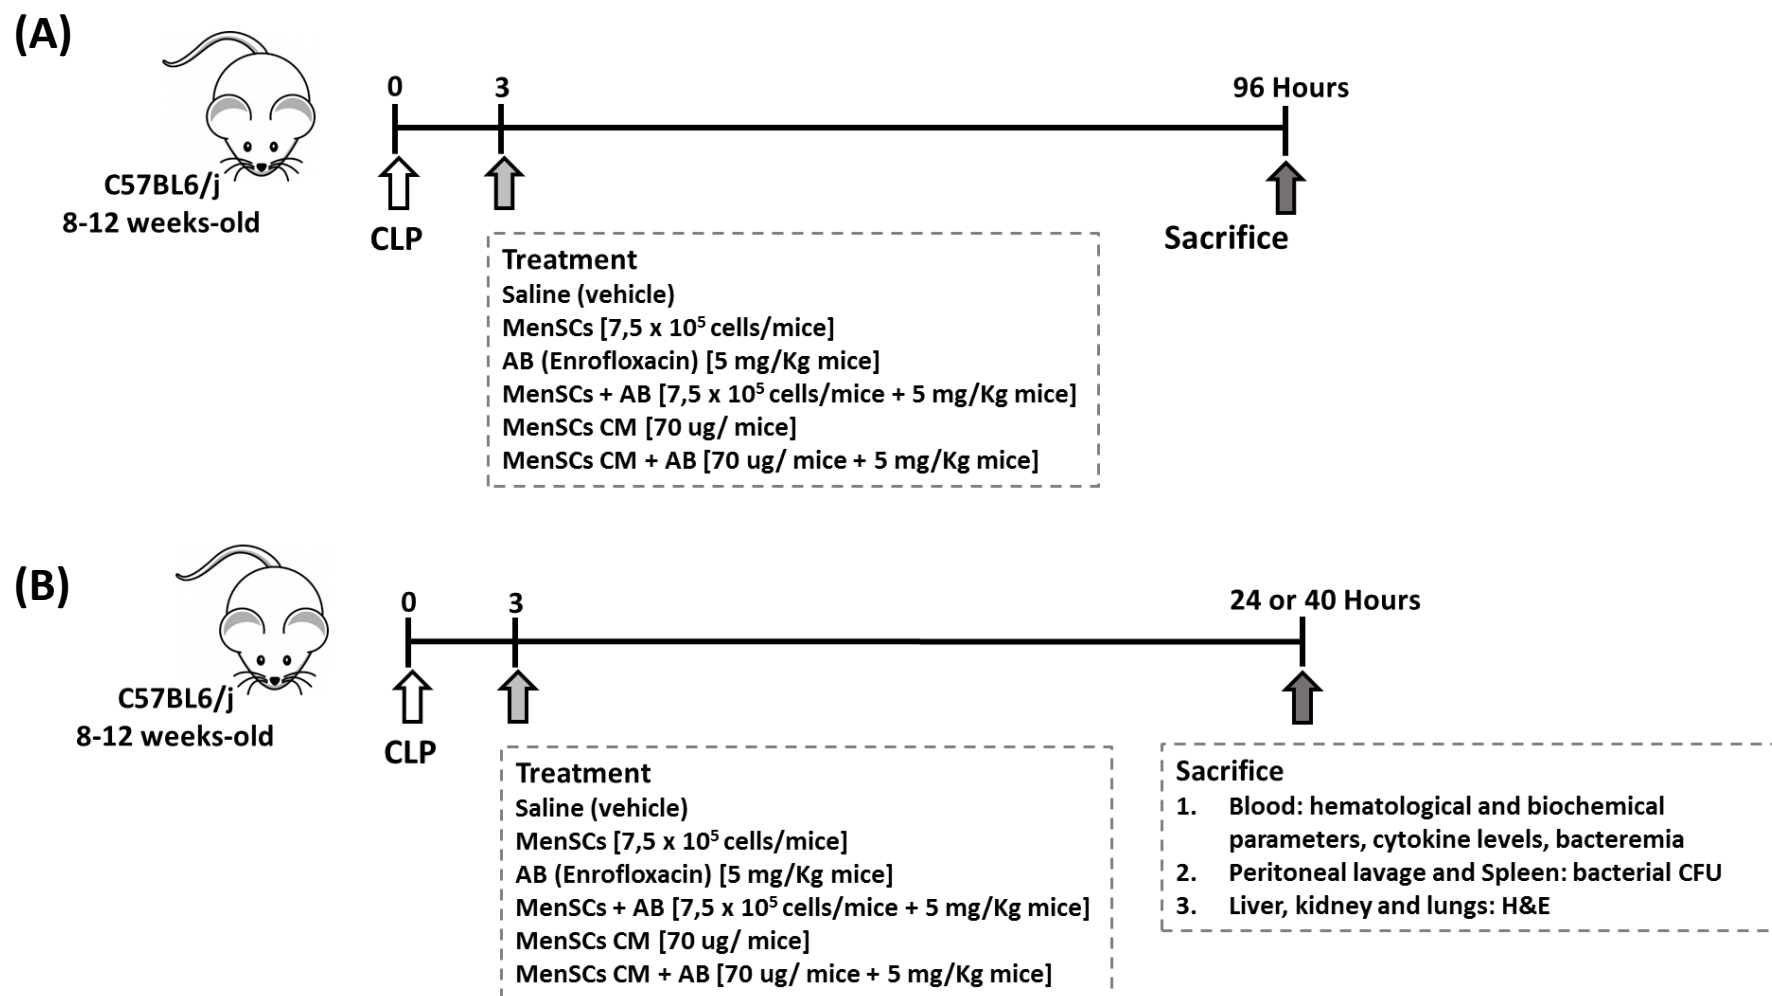

**Supplementary Figure 2. Experimental design for the *in vivo* studies.** Diagram of the experimental design of **(A)** survival studies and **(B)** therapeutical effects studies of MenSCs administration in mice with CLP-induced sepsis. Abbreviations: MenSCs, menstrual derived mesenchymal stem cells; AB, antibiotics; CM, conditioned medium; CFU, colony forming units.
