# Supplementary material for: Combination therapy of menstrual derived mesenchymal stem cells and antibiotics ameliorates survival in sepsis
Source: PubMed Central journal article supplement (PMC4609164; doi:10.1186/s13287-015-0192-0), 2015-10-16
Supplement: 13287_2015_192_MOESM3_ESM.pdf [file 13287_2015_192_MOESM3_ESM.pdf]

## Additional File 3

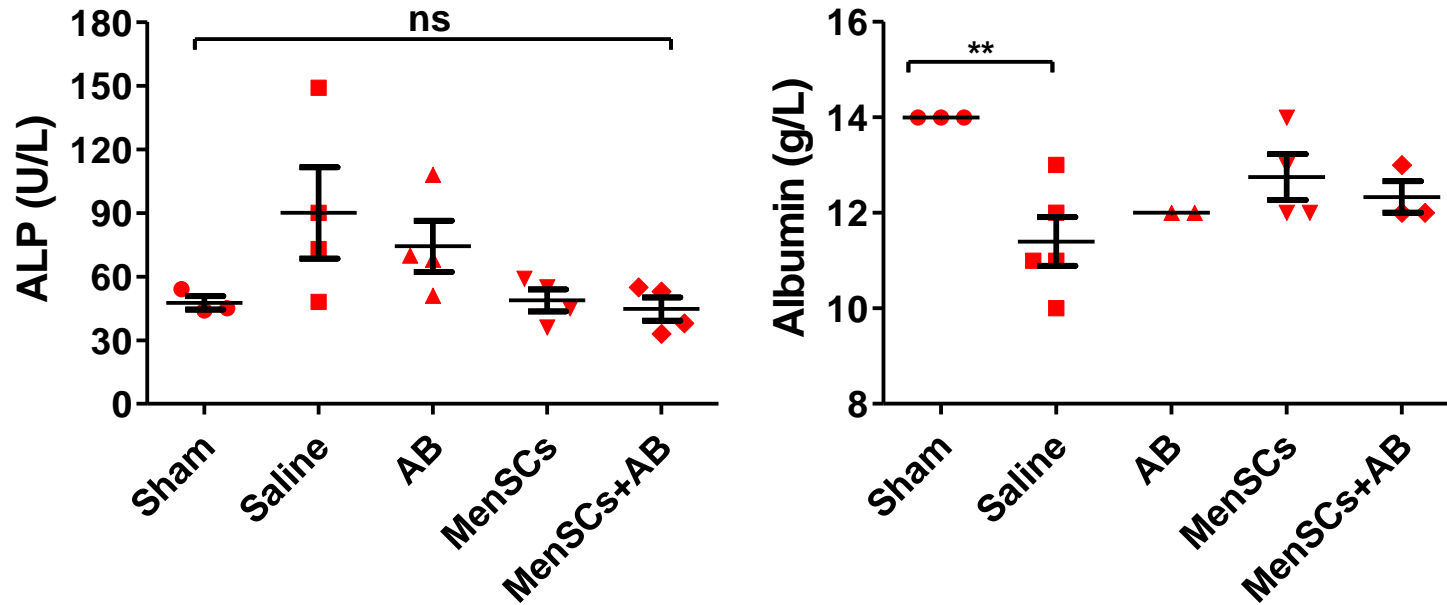

**Supplementary Figure 3. Effect of MenSCs treatment in mice with polymicrobial sepsis.** Serum was isolated 24 hours post sepsis induction and administration of different treatments with antibiotics (AB) and/or MenSCs (Sham, n=3; Saline, n=5; AB, n=2-4; MenSCs, n=4; MenSCs+AB, n=4) to determine the concentrations of alkaline phosphatase (ALP) (left panel) and albumin (right panel). Dot plots represent individual values, horizontal bars represent mean values and vertical bars represent SE values. \*\*  $p \leq 0.01$ . Abbreviations: MenSCs, menstrual derived mesenchymal stem cells; AB, antibiotics; SE, standard error; ns, not significant.
