# Supplementary material for: Combination therapy of menstrual derived mesenchymal stem cells and antibiotics ameliorates survival in sepsis
Source: PubMed Central journal article supplement (PMC4609164; doi:10.1186/s13287-015-0192-0), 2015-10-16
Supplement: 13287_2015_192_MOESM4_ESM.pdf [file 13287_2015_192_MOESM4_ESM.pdf]

# Additional File 4

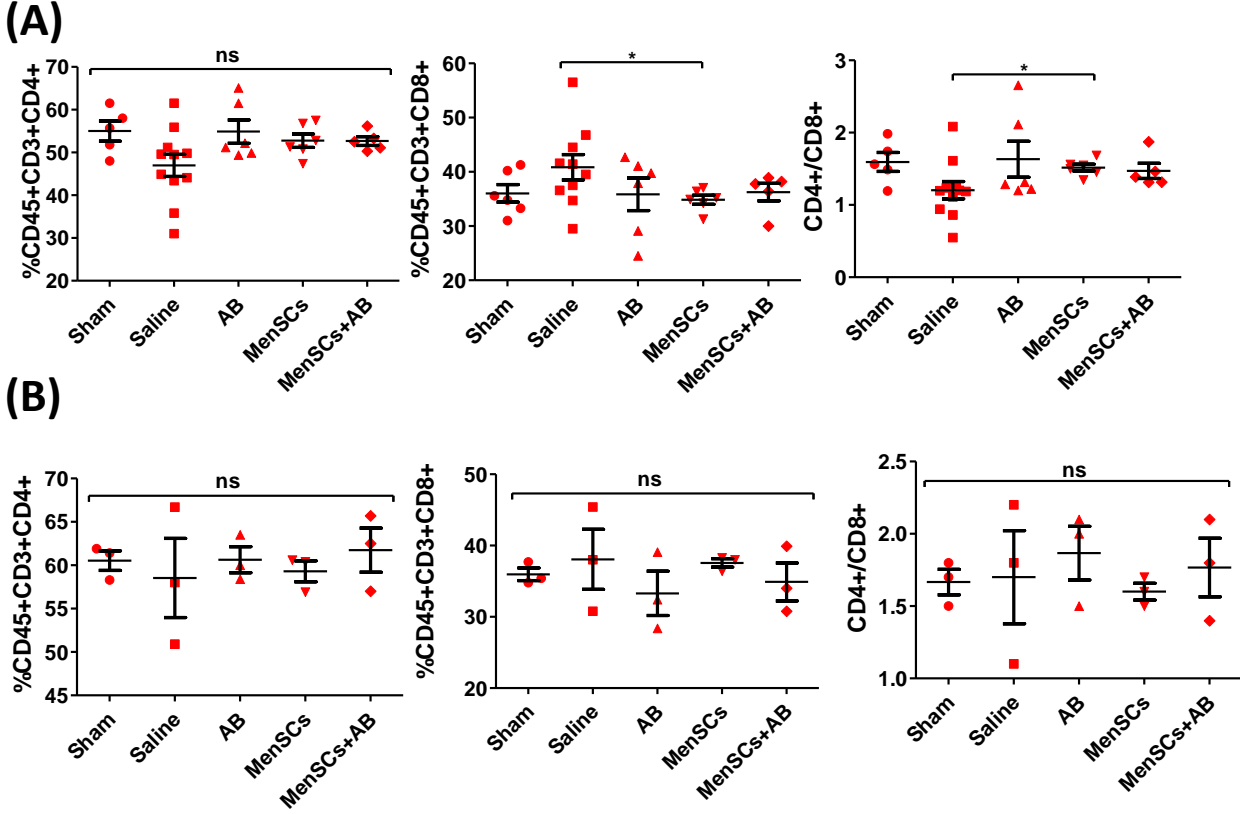

**Figure S4. Effect of MenSCs treatment on CD4+ and CD8+ lymphocytes in mice with polymicrobial sepsis.** Blood samples were obtained at different time points after induction of sepsis and administration of various treatments to determine specific lymphocyte subsets using flow cytometry (Sham, n=3-5; Saline, n=3-10; AB, n=3-6; MenSCs, n=3-6; MenSCs + AB, n=3-5). Graphs show the percentages of CD45+CD3+CD4+ and CD45+CD3+CD8+ lymphocytes, and the ratios of CD4+/CD8+ at **(A)** 24 hours and **(B)** 40 hours in untreated and treated mice. Dot plots represent individual values, horizontal bars represent mean values and vertical bars represent SE values. \*  $p \leq .05$ . Abbreviations: MenSCs, menstrual derived mesenchymal stem cells; AB, antibiotics; SE, standard error; ns, not significant.
